# Supplementary material for: Circulating factors associated with sarcopenia during ageing and after intensive lifestyle intervention
Source: PubMed Central journal article supplement — J Cachexia Sarcopenia Muscle. 2019 Apr 10;10(3):586–600. doi: 10.1002/jcsm.12417 (PMC6596393; doi:10.1002/jcsm.12417), 2019-04-10
Supplement: JCSM-10-586-s003.pdf [file JCSM-10-586-s003.pdf]

**Supplemental Table 1.**

Non-parametric ANOVA\* for all circulating factors across 3 EWGSOP subtypes of patients

 $(\alpha'=0.017)$ 

|                                           | <b>TWEAK</b>     | <b>TNF-<math>\alpha</math></b> | <b>IL-6</b> | <b>IL-18</b> | <b>Hs-CRP</b> | <b>leptin</b>    | <b>adiponectin</b> | <b>IGF1</b>      | <b>insulin</b> | <b>FGF21</b> |
|-------------------------------------------|------------------|--------------------------------|-------------|--------------|---------------|------------------|--------------------|------------------|----------------|--------------|
| <b>Sarcopenia vs. pre-sarcopenia</b>      | 0.151            | 0.891                          | 0.510       | 0.584        | 0.132         | 0.888            | 0.821              | <b>0.009</b>     | 0.404          | 0.414        |
| <b>Sarcopenia vs. Healthy control</b>     | <b>&lt;0.001</b> | <b>0.003</b>                   | 0.019       | <b>0.002</b> | 0.892         | <b>&lt;0.001</b> | <b>0.002</b>       | <b>0.011</b>     | 0.043          | 0.126        |
| <b>Pre-sarcopenia vs. Healthy control</b> | <b>0.011</b>     | <b>0.004</b>                   | 0.293       | <b>0.001</b> | 0.103         | 0.035            | <b>0.010</b>       | <b>&lt;0.001</b> | 0.031          | 0.186        |

\* One-way ANOVA on ranks (Kruskal-Wallis H test), the significance cutoff was set at 0.017 after Bonferroni correction for multiple hypothesis testing. Bolded values met the significance cutoff.
