# Supplementary material for: Circulating factors associated with sarcopenia during ageing and after intensive lifestyle intervention
Source: PubMed Central journal article supplement — J Cachexia Sarcopenia Muscle. 2019 Apr 10;10(3):586–600. doi: 10.1002/jcsm.12417 (PMC6596393; doi:10.1002/jcsm.12417), 2019-04-10
Supplement: JCSM-10-586-s004.pdf [file JCSM-10-586-s004.pdf]

**Supplemental Table 2.**

FGF21 levels across subjects according to sarcopenia and type 2 diabetes mellitus (DM) status

|                              | Pre-intervention sarcopenic subjects<br>(Mean±SD)/median(P <sub>25</sub> , P <sub>75</sub> ) |                                                |                                               | Post-intervention sarcopenic subjects<br>(Mean±SD)/median(P <sub>25</sub> , P <sub>75</sub> ) |                                               |                                               | Non-sarcopenic subjects<br>(Mean±SD)/median(P <sub>25</sub> , P <sub>75</sub> ) |                                             |                                               |
|------------------------------|----------------------------------------------------------------------------------------------|------------------------------------------------|-----------------------------------------------|-----------------------------------------------------------------------------------------------|-----------------------------------------------|-----------------------------------------------|---------------------------------------------------------------------------------|---------------------------------------------|-----------------------------------------------|
|                              | total                                                                                        | DM <sup>a</sup>                                | non-DM                                        | total                                                                                         | DM                                            | non-DM                                        | total                                                                           | DM                                          | non-DM                                        |
| FGF21<br>pg/ml<br>(P* value) | 49.99<br>(46.4,61.2)<br>p <sub>1</sub> =0.610                                                | 48.21<br>(46.3, 51.1)<br>p <sub>1</sub> =0.273 | 52.25<br>(46.4,63.0)<br>p <sub>1</sub> =1.000 | 53.80<br>(46.1,59.3)<br>p <sub>2</sub> =0.124                                                 | 49.02<br>(45.7,58.5)<br>p <sub>2</sub> =0.333 | 53.91<br>(46.1,59.7)<br>p <sub>2</sub> =0.300 | 58.00<br>(50.1,68.9)<br>p <sub>3</sub> =0.150                                   | 82.99 <sup>b</sup><br>p <sub>3</sub> =0.333 | 56.31<br>(49.1,63.9)<br>p <sub>3</sub> =0.483 |

<sup>a</sup> the sample size was small for all diabetes subjects; DM, diabetes mellitus; FGF21, Fibroblast growth factor 21;

<sup>b</sup> there was only one sample in this category;

\* The P<sub>1</sub> value represents the significance of differences between pre- and post- intervention, the P<sub>2</sub> value represents the significance of differences between post-intervention sarcopenic and non-sarcopenic elderly subjects, and the P<sub>3</sub> value represents the significance of differences between pre-intervention sarcopenic and non-sarcopenic elderly subjects. P value was calculated by Mann-Whitney U test.
