# Supplementary figures and images for: Circulating factors associated with sarcopenia during ageing and after intensive lifestyle intervention
Source: PubMed Central journal article supplement — J Cachexia Sarcopenia Muscle. 2019 Apr 10;10(3):586–600. doi: 10.1002/jcsm.12417 (PMC6596393; doi:10.1002/jcsm.12417), 2019-04-10

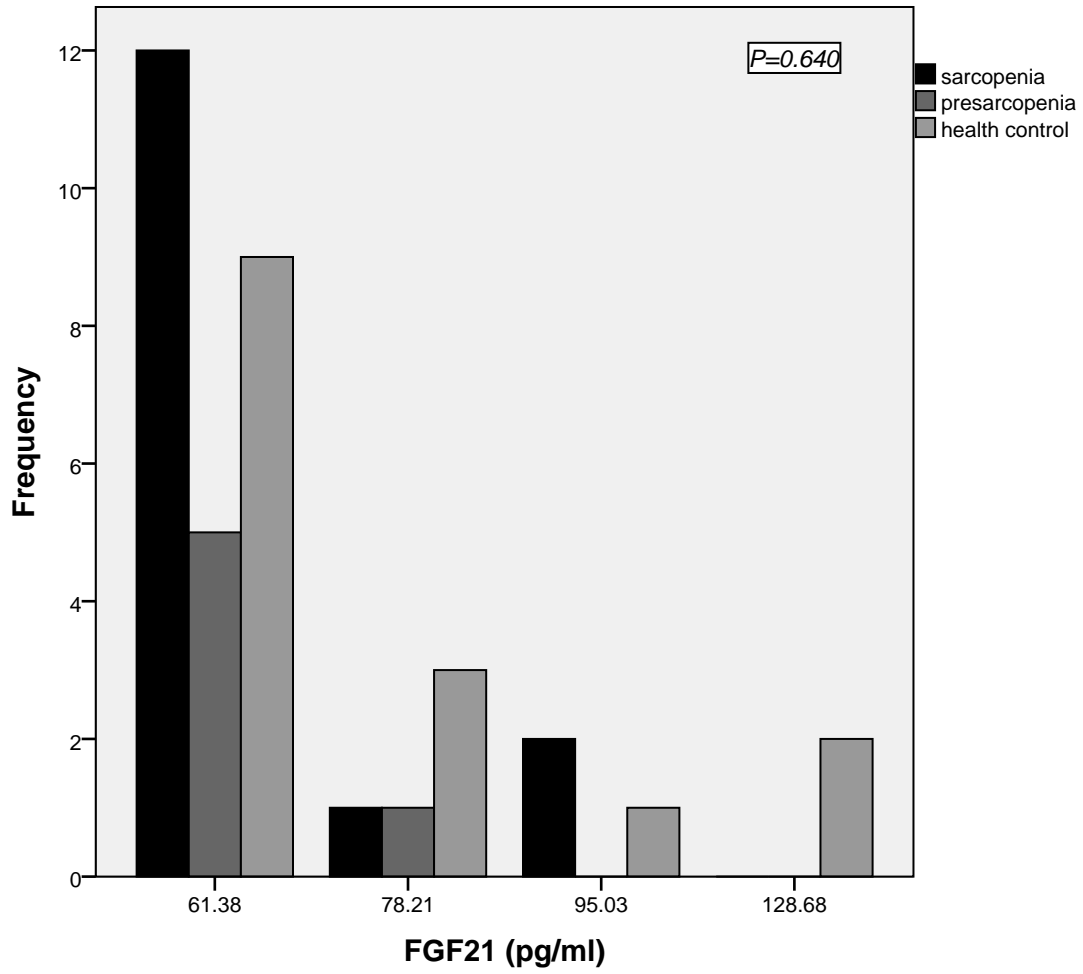

Supplement: JCSM-10-586-s001.pdf [file JCSM-10-586-s001.pdf]

- Muscle strength
- Extremities muscle mass

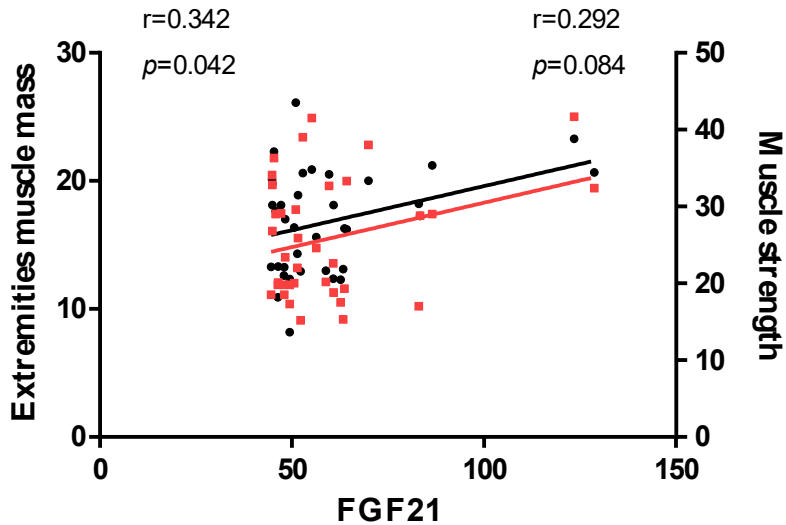

Supplement: JCSM-10-586-s002.pdf [file JCSM-10-586-s002.pdf]
